# Supplementary material for: IL‐10 producing type 2 innate lymphoid cells prolong islet allograft survival
Source: PubMed Central journal article supplement (PMC7645373; doi:10.15252/emmm.202012305), 2020-10-09
Supplement: EMMM-12-e12305-s001.pdf [file EMMM-12-e12305-s001.pdf]

## **Appendix**

Content:

**Appendix Fig. S1:** IL-33 treatment improved glycemia, but not survival rate in STZ-induced diabetic mice.

**Appendix Fig. S2:** IL-33 induce a Th1-to-Th2 switch in vivo.

**Appendix Fig. S3:** Distribution of ILC2s in mice treated with IL-33.

**Appendix Fig. S4:** IL-33 enhanced the expression of CD25 in ILC2s.

**Appendix Fig. S5:** The expression of signature cytokines in locally transplanted ILC2<sup>10</sup>.

**Appendix Table S1:** PCR primer sequences.

**Appendix Table S2:** List of exact P-values.

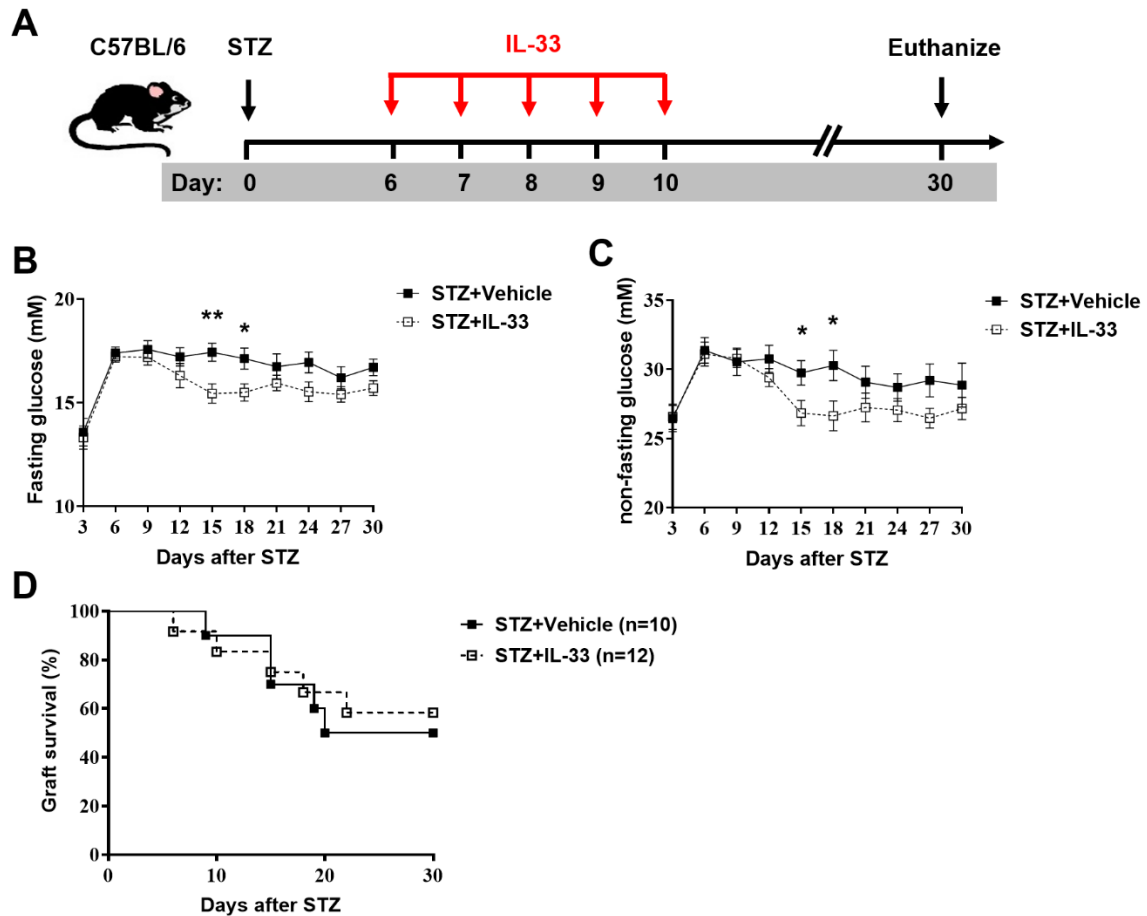

**Appendix Figure S1. IL-33 treatment improved glycemia, but not survival rate in STZ-induced diabetic mice.**

(A) STZ-induced diabetic C57BL/6 mice were treated with vehicle or IL-33 daily from day 6 to 10 post-STZ injection. (B and C) Fasting and non-fasting blood glucose concentrations were monitored. Data shown are the mean  $\pm$  SEM (n=7-9 per group) and an unpaired t-test was performed. \*P<0.05, \*\*P<0.01. (D) Survival rate of diabetic C57BL/6 mice treated with vehicle or IL-33.

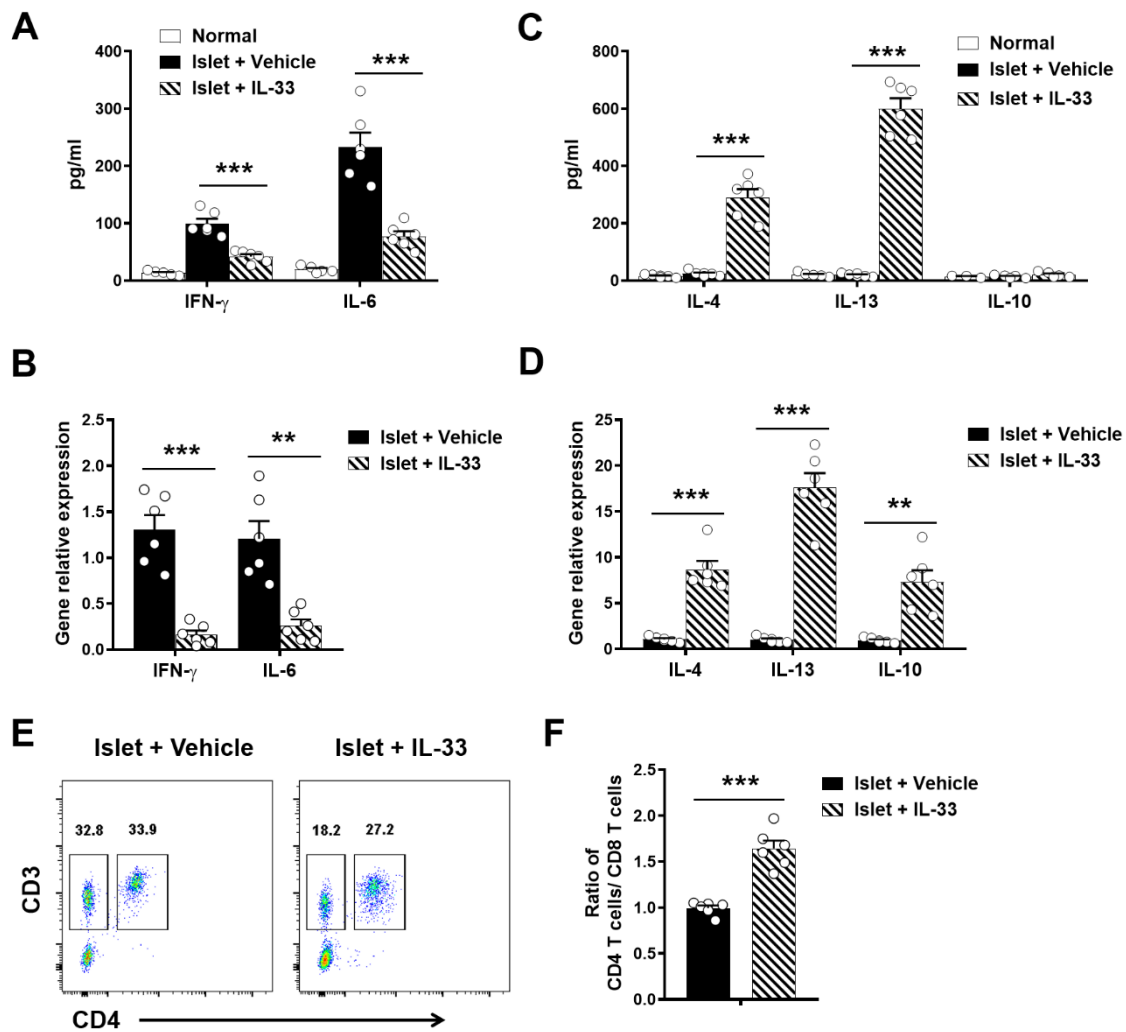

**Appendix Figure S2. IL-33 induce a Th1-to-Th2 switch in vivo.**

(A and C) IFN- $\gamma$ , IL-6, IL-4, IL-10 and IL-13 levels in serum were assessed in normal, Islet+Vehicle and Islet+IL-33 groups at day 5 post islet transplantation. (B and D) The mRNA expression of IFN- $\gamma$ , IL-6, IL-4, IL-10 and IL-13 in islet allografts was examined by qPCR, and expressed relative to the control of each experiment. Data shown are the mean  $\pm$  SEM (n=6 per group) and an unpaired t-test was performed. \*\*P<0.01, \*\*\*P<0.001. (E) Representative FACS analysis showing the proportion of CD4<sup>+</sup> T cells, and CD8<sup>+</sup> T cells (CD3<sup>+</sup>CD4<sup>-</sup> cells) in the CD45<sup>+</sup> leukocyte compartment of islet graft of mice receiving vehicle or IL-33. (F) Ratio of CD4 T cells/CD8 T cells in islet graft of mice receiving vehicle or IL-33. \*\*\*P<0.001.

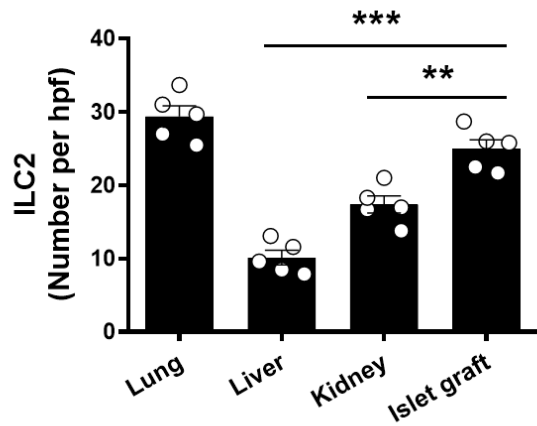

**Appendix Figure S3. Distribution of ILC2s in mice treated with IL-33.**

Streptozotocin-induced diabetic C57BL/6 mice with IL-33 treatment were transplanted with BALB/c islets. Mice were sacrificed at day 5 post-islet transplantation. The numbers of CD3(-)CD127+ST2+ ILC2s in lung, liver, kidney and islet graft were counted. Data shown are the mean  $\pm$  SEM (n=5 per group) and a one-way ANOVA was performed; \*\*P<0.01, \*\*\*P<0.001.

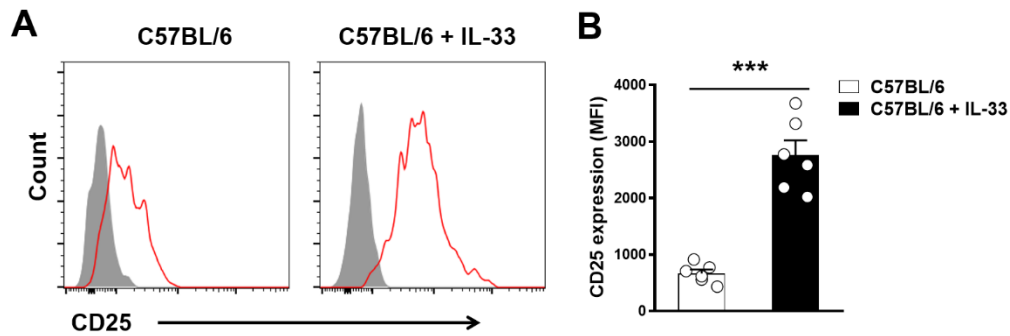

**Appendix Figure S4. IL-33 enhanced the expression of CD25 in ILC2s.**

C57BL/6 mice were treated with mouse recombinant IL-33 or PBS daily for 5 consecutive days. (A and B) The expression of CD25 was examined in kidney ILC2s by flow cytometry. ILC2s (red lines) and isotype controls (gray-filled areas) are shown. Data represent the mean  $\pm$  SEM of evaluations of MFI from each group (n=6 per group) and an unpaired t-test was performed. \*\*\*P<0.001. MFI, mean fluorescence intensity.

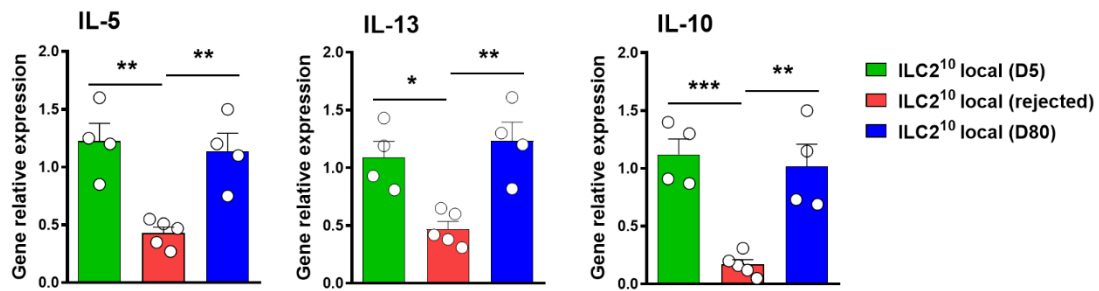

**Appendix Figure S5. The expression of signature cytokines in locally transplanted ILC2<sup>10</sup>.**

The locally transplanted CD45.2+ST2+ ILC2<sup>10</sup> were isolated from islet grafts by flow sorting at day 5 and 80 post-islet transplantation or at the day when grafts were considered rejected. The mRNA expression of IL-5, IL-13 and IL-10 in locally transplanted ILC2<sup>10</sup> was examined by qPCR, and expressed relative to the control of each experiment. Data shown are the mean  $\pm$  SEM (n=4-5 per group) and a one-way ANOVA was performed. \*\*P<0.01, \*\*\*P<0.001.

**Appendix Table S1.** Real-time PCR primers

| <b>Gene</b>   | <b>Forward (5'-3')</b> | <b>Reverse (5'-3')</b> |
|---------------|------------------------|------------------------|
| IL-4          | tcaacccccagctagtgtgc   | tctgtggtgttcttcgttgc   |
| IL-5          | aaagagaagtgtggcgaggag  | tcaccatggagcagctcag    |
| IL-13         | cagcatggtatggagtgtgg   | aggctggagaccgtagtgg    |
| IL10          | ccagtacagccgggaagaca   | cagctggtcctttgttgaaga  |
| IFN- $\gamma$ | gcgtcattgaatcacacctg   | acctgtgggttgtgacctc    |
| IL-6          | cacaagtccggagaggagac   | ttgccattgcacaactctt    |
| IL-25         | tggagctatgagttggacagg  | gaagaccgtctggttgggt    |
| IL-33         | acattgagcatccaaggaactt | gcgtagtagcacctggcttg   |
| TSLP          | aggctaccctgaaactgag    | ggagattgcatgaaggaatacc |

TSLP: thymic stromal lymphopoietin

**Appendix Table S2.** List of exact P-values

| Figure   | Panel | sub-panel | compared groups, P-value                                                                                                              |
|----------|-------|-----------|---------------------------------------------------------------------------------------------------------------------------------------|
| Figure 1 | B     |           | Islet+IL-33 vs Islet+vehicle <0.0001                                                                                                  |
|          | E     |           | Islet+IL-33 (D30) vs Islet+vehicle <0.0001<br>Islet+IL-33 (D30) vs Islet+vehicle <0.0001                                              |
| Figure 2 | A     |           | IL-33 vs PBS <0.0001                                                                                                                  |
|          | B     |           | IL-33 vs PBS 0.0006                                                                                                                   |
|          | C     |           | IL-33 vs PBS 0.0030                                                                                                                   |
|          | D     |           | IL-33 vs PBS <0.0001                                                                                                                  |
| Figure 3 | B     |           | Islet+IL-33 (D7) vs Islet+vehicle <0.0001                                                                                             |
|          | C     |           | Islet+IL-33 (D7) vs Islet+vehicle <0.0001                                                                                             |
|          | D     |           | Islet+IL-33 (D7) vs Islet+vehicle <0.0001                                                                                             |
|          | F     |           | Islet+IL-33 (D7) vs Islet+vehicle <0.0001                                                                                             |
|          | G     |           | Islet+IL-33 (D7) vs Islet+vehicle <0.0001<br>Islet+IL-33 (D30) vs Islet+vehicle <0.0001<br>Islet+IL-33 (D80) vs Islet+vehicle 0.0055  |
|          | H     |           | Islet+IL-33 (D7) vs Islet+vehicle <0.0001<br>Islet+IL-33 (D30) vs Islet+vehicle <0.0001<br>Islet+IL-33 (D80) vs Islet+vehicle <0.0001 |
|          | J     | IL-33     | Islet+IL-33 (D7) vs Islet+vehicle <0.0001<br>Islet+IL-33 (D30) vs Islet+vehicle 0.0004<br>Islet+IL-33 (D80) vs Islet+vehicle 0.0020   |
| Figure 4 | B     | Spleen    | Islet+IL-33/DT vs Islet+IL-33 <0.0001<br>Islet+IL-33/PC61 vs Islet+IL-33 <0.0001<br>Islet+IL-33/DT/PC61 vs Islet+IL-33 <0.0001        |
|          |       | Kidney    | Islet+IL-33/DT vs Islet+IL-33 <0.0001<br>Islet+IL-33/PC61 vs Islet+IL-33 <0.0001<br>Islet+IL-33/DT/PC61 vs Islet+IL-33 <0.0001        |
|          | C     | Spleen    | Islet+IL-33/PC61 vs Islet+IL-33 0.0003                                                                                                |



|          |   |        |                                                                                                                                                                                                                                                                                                                        |
|----------|---|--------|------------------------------------------------------------------------------------------------------------------------------------------------------------------------------------------------------------------------------------------------------------------------------------------------------------------------|
|          |   |        | Islet+IL-33/DT/PC61 vs Islet+IL-33 0.0005                                                                                                                                                                                                                                                                              |
|          |   | Kidney | Islet+IL-33/PC61 vs Islet+IL-33 <0.0001<br>Islet+IL-33/DT/PC61 vs Islet+IL-33 <0.0001                                                                                                                                                                                                                                  |
|          | D |        | Islet+IL-33/DT vs Islet+IL-33 0.0280<br>Islet+IL-33/PC61 vs Islet+IL-33/DT 0.0086<br>Islet+IL-33/DT/PC61 vs Islet+IL-33/DT 0.0066                                                                                                                                                                                      |
| Figure 5 | A |        | Islet+IL-33 vs Islet+vehicle 0.0002                                                                                                                                                                                                                                                                                    |
|          | B |        | Islet+IL-33 vs Islet+vehicle 0.0005                                                                                                                                                                                                                                                                                    |
|          | C |        | IL-33/IL-2C vs IL-33 <0.0001                                                                                                                                                                                                                                                                                           |
|          | D |        | IL-33/IL-2C vs Medium <0.0001                                                                                                                                                                                                                                                                                          |
|          | E |        | IL-33/IL-2C vs Medium 0.0002                                                                                                                                                                                                                                                                                           |
|          | F |        | IL-33/IL-2C vs Medium 0.0001                                                                                                                                                                                                                                                                                           |
|          | G |        | IL-33/IL-2C+STAT5-IN vs IL-33/IL-2C <0.0001                                                                                                                                                                                                                                                                            |
| Figure 6 | A |        | ILC2 <sup>10</sup> -IL-10 vs ILC2 <sup>10</sup> -C <0.0001                                                                                                                                                                                                                                                             |
|          | D |        | Islet+ILC2 <sup>10</sup> -C vs Islet+vehicle 0.0005<br>Islet+ILC2 <sup>10</sup> -IL-10 vs Islet+ILC2 <sup>10</sup> -C 0.0007<br>Islet+non-ILC2 <sup>10</sup> vs Islet+ILC2 <sup>10</sup> -C 0.0016                                                                                                                     |
|          | E |        | Islet+ILC2 <sup>10</sup> -C vs Islet+vehicle <0.0001<br>Islet+ILC2 <sup>10</sup> -IL-10 vs Islet+ILC2 <sup>10</sup> -C <0.0001<br>Islet+non-ILC2 <sup>10</sup> vs Islet+ILC2 <sup>10</sup> -C <0.0001                                                                                                                  |
|          | G |        | CD4+ILC2 <sup>10</sup> +anti-IL-10 vs CD4+ILC2 <sup>10</sup> 0.0003<br>CD4+ILC2 <sup>10</sup> -IL-10 vs CD4+ILC2 <sup>10</sup> -C <0.0001                                                                                                                                                                              |
| Figure 7 | B |        | Islet+ILC2 <sup>10</sup> local (1x10 <sup>6</sup> ) vs Islet+ ILC2 <sup>10</sup> iv 0.0002<br>Islet+ILC2 <sup>10</sup> local (2x10 <sup>5</sup> ) vs Islet+ ILC2 <sup>10</sup> iv 0.0009<br>Islet+ ILC2 <sup>10</sup> -IL-10 local (2x10 <sup>5</sup> ) vs Islet+ILC2 <sup>10</sup> local (2x10 <sup>5</sup> ) <0.0001 |
|          | D |        | ILC2 <sup>10</sup> local (rejected) vs ILC2 <sup>10</sup> local (D5) <0.0001<br>ILC2 <sup>10</sup> local (D80) vs ILC2 <sup>10</sup> local (D5) 0.0031<br>ILC2 <sup>10</sup> local (D80) vs ILC2 <sup>10</sup> local (rejected) 0.0080                                                                                 |
|          | E |        | ILC2 <sup>10</sup> local (D80) vs ILC2 <sup>10</sup> local (D5) 0.0019                                                                                                                                                                                                                                                 |

|                  |   |               |                                                                                                                                                               |
|------------------|---|---------------|---------------------------------------------------------------------------------------------------------------------------------------------------------------|
|                  |   |               | ILC2 <sup>10</sup> local (D80) vs ILC2 <sup>10</sup> local (rejected) 0.0015                                                                                  |
|                  | F |               | ILC2 <sup>10</sup> local (rejected) vs ILC2 <sup>10</sup> local (D5) <0.0001<br>ILC2 <sup>10</sup> local (D80) vs ILC2 <sup>10</sup> local (rejected) <0.0001 |
| Appendix Fig. S1 | B | D15           | STZ+IL-33 vs STZ+vehicle 0.0075                                                                                                                               |
|                  |   | D18           | STZ+IL-33 vs STZ+vehicle 0.0260                                                                                                                               |
|                  | C | D15           | STZ+IL-33 vs STZ+vehicle 0.0400                                                                                                                               |
|                  |   | D18           | STZ+IL-33 vs STZ+vehicle 0.0335                                                                                                                               |
| Appendix Fig. S2 | A | IFN- $\gamma$ | Islet+IL-33 vs Islet+vehicle 0.0004                                                                                                                           |
|                  |   | IL-6          | Islet+IL-33 vs Islet+vehicle 0.0008                                                                                                                           |
|                  | B | IFN- $\gamma$ | Islet+IL-33 vs Islet+vehicle 0.0005                                                                                                                           |
|                  |   | IL-6          | Islet+IL-33 vs Islet+vehicle 0.0031                                                                                                                           |
|                  | C | IL-4          | Islet+IL-33 vs Islet+vehicle 0.0002                                                                                                                           |
|                  |   | IL-13         | Islet+IL-33 vs Islet+vehicle <0.0001                                                                                                                          |
|                  | D | IL-4          | Islet+IL-33 vs Islet+vehicle 0.0004                                                                                                                           |
|                  |   | IL-13         | Islet+IL-33 vs Islet+vehicle 0.0001                                                                                                                           |
|                  |   | IL-10         | Islet+IL-33 vs Islet+vehicle 0.0042                                                                                                                           |
|                  | F |               | Islet+IL-33 vs Islet+vehicle 0.0003                                                                                                                           |
| Appendix Fig. S3 |   |               | Kidney vs Liver 0.0025<br>Islet graft vs Liver <0.0001                                                                                                        |
| Appendix Fig. S4 | B |               | C57BL/6+IL-33 vs C57BL/6 <0.0001                                                                                                                              |
| Appendix Fig. S5 |   | IL-5          | ILC2 <sup>10</sup> local (rejected) vs ILC2 <sup>10</sup> local (D5) 0.0021<br>ILC2 <sup>10</sup> local (D80) vs ILC2 <sup>10</sup> local (rejected) 0.0046   |
|                  |   | IL-13         | ILC2 <sup>10</sup> local (rejected) vs ILC2 <sup>10</sup> local (D5) 0.0111<br>ILC2 <sup>10</sup> local (D80) vs ILC2 <sup>10</sup> local (rejected) 0.0030   |
|                  |   | IL-10         | ILC2 <sup>10</sup> local (rejected) vs ILC2 <sup>10</sup> local (D5) 0.0008<br>ILC2 <sup>10</sup> local (D80) vs ILC2 <sup>10</sup> local (rejected) 0.0019   |
